# Supplementary material
Source: PubMed Central journal article supplement (PMC3957836)

**Supplementary table 1.** Primer pairs used for PCR amplification for confirmation of mutations in the gene of the S10 ribosomal protein, in *ramR* and for the identification of variants of the 16S rDNA gene in each of the 8 copies of rDNA clusters

| Target      | Primer pair | Nucleotide primer sequence    | Primer position in CP003200 sequence | Amplicon size (bp)        |
|-------------|-------------|-------------------------------|--------------------------------------|---------------------------|
| 1-16S       | 16S KPN RV  | 5'-TTGACGTCATCCCCACCTTC-3'    | 15687-17374                          | -                         |
|             | 1-PTR FW    | 5'-GCTGTGCGCTTAAAGACAT-3'     |                                      | 1688                      |
| 2-16S       | 2-GltRac FW | 5'-TATGGCTTCTCGACGCTGG-3'     | 120212-121819                        | 1626                      |
| 3-16S       | 3-PhotOX FW | 5'-CACAAATGGCGCGCAAATAG-3'    | 213669-212107                        | 1601                      |
| 4-16S       | 4-BPur FW   | 5'-TTGTTGCATGGTATTAAATCCCC-3' | 256988-258817                        | 1830                      |
| 5-16S       | 5-Hyp FW    | 5'-GGGCCAGTTAATGTTGAGTTG-3'   | 626645-628458                        | 1811                      |
| 6-16S       | 6-DD17 FW   | 5'-GAAAAAGCGGCGGATTGGG-3'     | 1001674-1003306                      | 1633                      |
| 7-16S       | 7-PDCh FW   | 5'-ATCGAGCTGGTAGTAAAAGACG-3'  | 4034886-4033224                      | 1703                      |
| 8-16S       | 8-Exap FW   | 5'-GGTGAAAATTGAGCAAATCGTG-3'  | 4846754-4845201                      | 1594                      |
| <i>rpsJ</i> | S10 RV      | 5'-ATGCAGAACCAAAGAATCCGTAT-3' | 4870582-4870893                      | 312                       |
|             | S10 FW      | 5'-TTAACCCAGGCTGATCTGCACG-3'  |                                      |                           |
| <i>ramR</i> | RamR RV     | 5'-GGTAGGTCAGGGCGATAC-3'      | 1437547-1438219                      | 659/673/1978 <sup>a</sup> |
|             | RamR FW     | 5'-AGATCGGCGGTTTGTTTAAA-3'    |                                      |                           |

<sup>a</sup>: amplicon size changes according to deletions of 13 nucleotides or insertion of ISKpn18 element in the *ramR* gene

PCR conditions were as follows: PCR for *rpsJ* and *ramR* genes were performed with an initial denaturation at 95°C for 5 min followed by 30 cycles of denaturation at 95°C 45 sec, annealing at 59°C 15 sec, and extension at 72°C 30 sec (*rpsJ*) or 120 sec (*ramR*) and a final extension of 5 min at 75°C, using the Bioline MyFi Taq Polymerase (Bioline USA Inc). 16S PCRs amplifications were performed using the same 16S KPN RV primer in combination with the different FW primers, with an initial denaturation at 95°C for 1 min followed by 30 cycles of denaturation at 98°C 10 sec, annealing-elongation at 57°C for 120 sec, using the Ranger DNA polymerase (Bioline USA Inc).

**Supplementary table 2.** Differences identified in predicted coding sequences of genomes of the tigecycline intermediate and resistant *Klebsiella pneumoniae* strains, by comparison with the genome of the susceptible strain

| predicted CDS function                                     | Contig_KP3-S<br>(nt position) | KP3-S                  | KP1-I           | KP2-R           | KP4-R         | KP5-R                                |
|------------------------------------------------------------|-------------------------------|------------------------|-----------------|-----------------|---------------|--------------------------------------|
| putative fimbrial biogenesis, outer membrane usher protein | Contig 12<br>(81247-78731)    | conserved              | conserved       | conserved       | conserved     | Thr787→Pro787                        |
| putative protoheme IX biogenesis protein                   | Contig 23<br>(49594-50820)    | conserved              | conserved       | conserved       | conserved     | Lys292→Asn292                        |
| FimH fimbrial protein                                      | Contig 1<br>(100850-101794)   | conserved              | conserved       | conserved       | conserved     | Thr97→Pro97                          |
| putative fumarate lyase                                    | Contig 13<br>(139934-141295)  | conserved              | conserved       | conserved       | Pro205→Ser205 | conserved                            |
| 3-(2,3-dihydroxyphenyl) propionate dioxygenase             | Contig 5<br>(150362-149679)   | Frameshift<br>at Phe58 | conserved       | conserved       | conserved     | conserved                            |
| translation elongation factor Tu                           | Contig 29<br>(35967-34747)    | conserved              | Depletion by IS | Depletion by IS | conserved     | conserved                            |
| hypothetical prophage protein                              | Contig 7<br>(61919-63469)     | conserved              | conserved       | conserved       | conserved     | Depletion by stop<br>codon at Ser281 |
| hypothetical protein                                       | Contig 21<br>(35237-34776)    | conserved              | conserved       | conserved       | Pro88→Gln88   | conserved                            |
| hypothetical protein                                       | Contig 2<br>(308119-307970)   | conserved              | conserved       | conserved       | Asn5→Ser5     | conserved                            |
| hypothetical protein                                       | Contig 52<br>(5065-5979)      | conserved              | conserved       | conserved       | conserved     | Ile59→Lys59                          |

### Supplementary Figure 1

Tigecycline linked to 16S rRNA (pink) via a coordinated Mg<sup>2+</sup> ion (yellow ball). The Lys-55 residue in *Thermus thermophilus* S10 is the equivalent of the Val-57 in the *K. pneumoniae* S10, which was mutated in the KP4-R strain. This residue maps in the vertex of a loop that is at 8 Å from the tigecycline binding site (*mmdb\_4G5T*; 5)

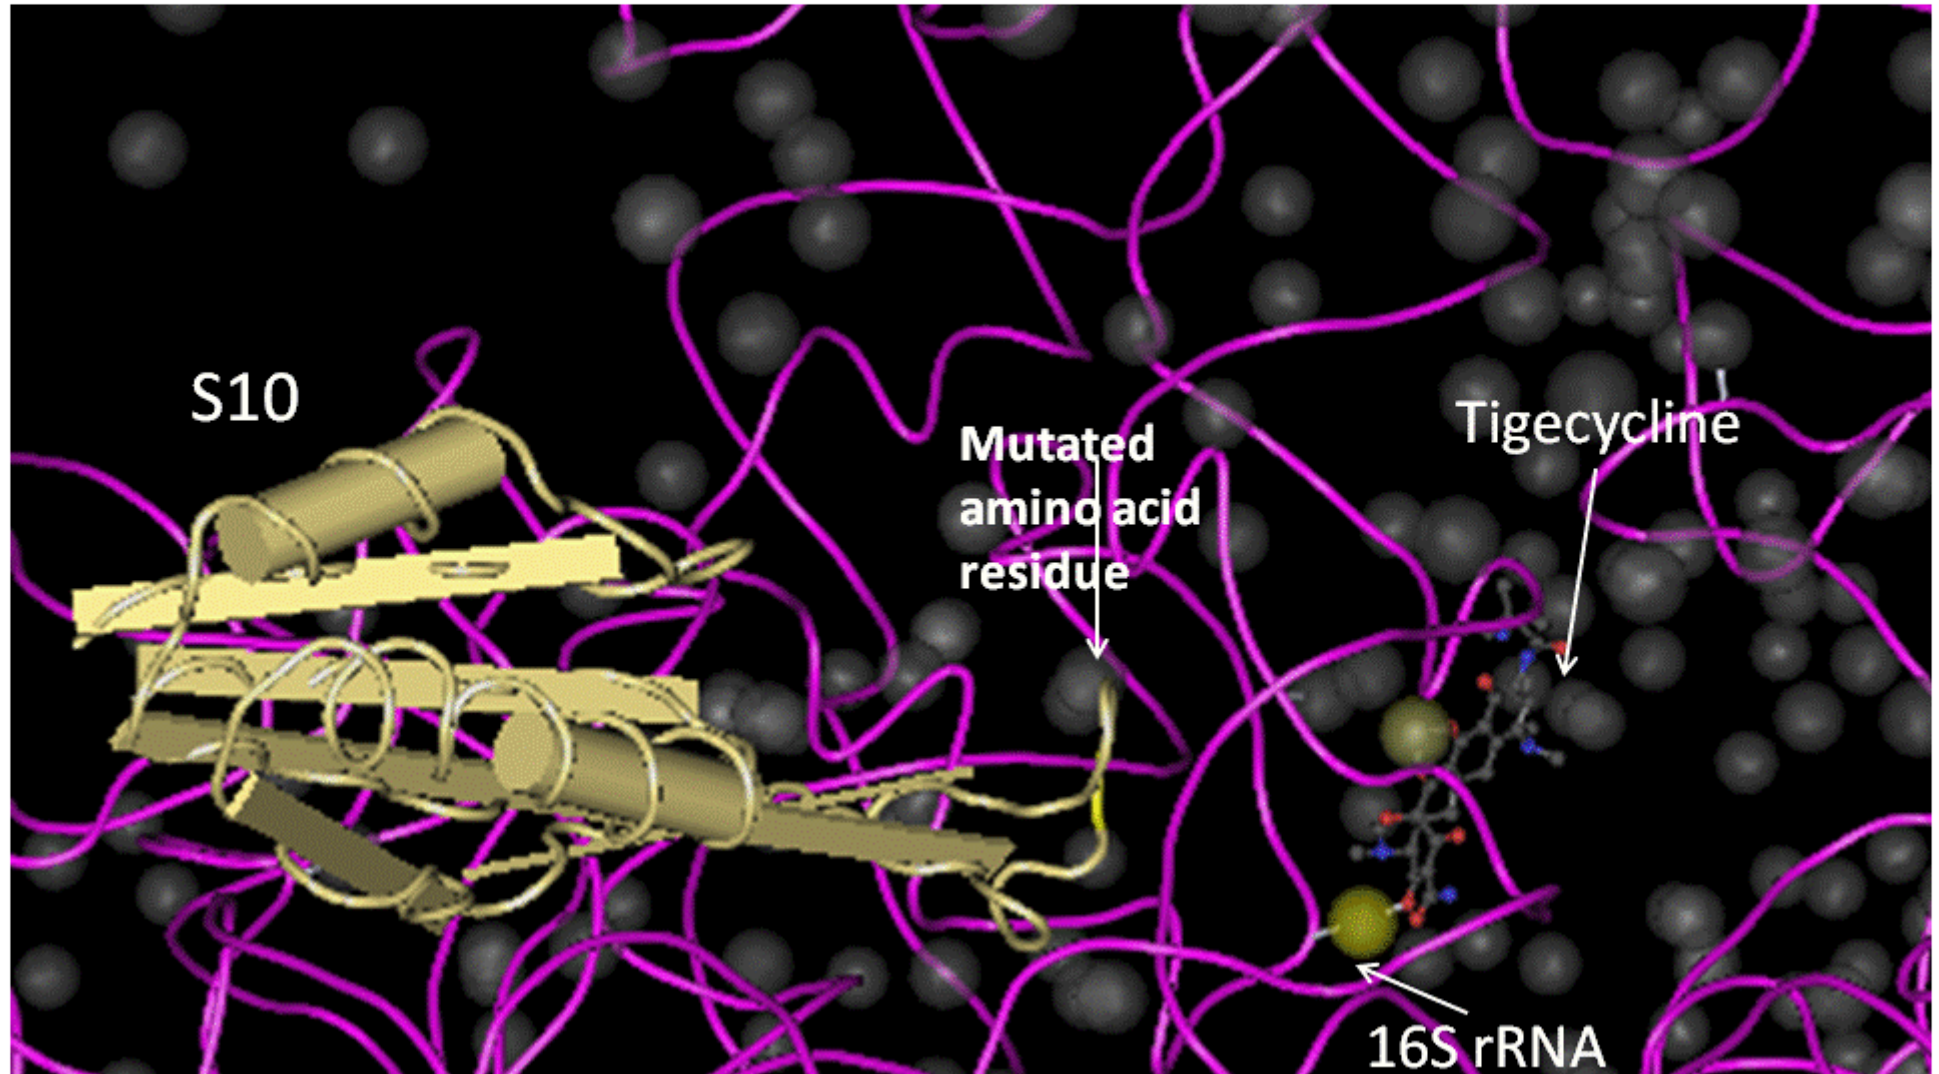

Supplement: AAC.01803-13_zac003142676so1.pdf [file AAC.01803-13_zac003142676so1.pdf]
